# Supplementary material for: Evolution of the Pseudomonas aeruginosa mutational resistome in an international Cystic Fibrosis clone
Source: PubMed Central journal article supplement (PMC5514035; doi:10.1038/s41598-017-05621-5), 2017-07-17
Supplement: 41598_2017_5621_MOESM2_ESM.pdf [file 41598_2017_5621_MOESM2_ESM.pdf]

## Supplementary Material

### **Evolution of the *Pseudomonas aeruginosa* mutational resistome in an international Cystic Fibrosis clone.**

Carla López-Causapé, Lea Mette Sommer, Gabriel Cabot, Rosa Rubio, Alain A. Ocampo-Sosa, Helle Krogh Johansen, Joan Figuerola, Rafael Cantón, Timothy J. Kidd, Soeren Molin and Antonio Oliver.
